# Supplementary material for: Mapping the Urban Lead Exposome: A Detailed Analysis of Soil Metal Concentrations at the Household Scale Using Citizen Science
Source: Preprints.org preprint supplement (doi:10.20944/preprints201806.0271.v1), 2018-06-18
Supplement: Supplementary file 3 [file supplementary]

Supplementary Material

Filippelli et al., IJERPH Urban Exposome

Table of all soil geochemical data of each location type in Indianapolis, IN (USA). Rows are multiple elements of the same samples. Soil samples were dried, sieved to 150 microns, and weighed and ashed in a muffle furnace at 550 degrees Celsius to degrade organic matter. The ashed sample was then transferred to 15 mL HDPE disposable centrifuge tube and digested overnight in 2N HCl at room temperature on a shaker table. After centrifugation, a subsample of the supernatant was diluted (1:100) with Milli-Q water and analyzed on a Perkin Elmer ICP-OES for a suite of metals, specifically lead (Pb), manganese (Mn), barium (Ba), chromium (Cr), copper (Cu), and zinc (Zn). Typical sample reproducibility, calculated from multiple measurements of the same soil ashed, digested, and analyzed was 5% for all elements. Cadmium was also included in the initial analysis, but unacceptably high levels of detection and poor sample reproducibility precluded its effective use in this study.

|  | Pb | Mn | Ba | Cr | Cu | Zn |
| --- | --- | --- | --- | --- | --- | --- |
|  | ppm | pm | ppm | ppm | ppm | ppm |
| Dripline |  |  |  |  |  |  |
|  | 7 | 583 | 33 | 11 | 5 | 31 |
|  | 3,153 | 587 | 250 | 18 | 16 | 1,512 |
|  | 1,513 | 765 | 214 | 33 | 44 | 910 |
|  | 15 | 694 | 92 | 15 | 12 | 167 |
|  | 15 | 672 | 101 | 16 | 13 | 182 |
|  | 9 | 605 | 59 | 14 | 9 | 44 |
|  | 7 | 419 | 48 | 13 | 11 | 63 |
|  | 366 | 396 | 72 | 12 | 8 | 277 |
|  | 370 | 396 | 83 | 14 | 9 | 323 |
|  | 2,752 | 831 | 296 | 23 | 47 | 1,096 |
|  | 2,547 | 797 | 251 | 23 | 39 | 960 |
|  | 87 | 766 | 73 | 30 | 21 | 463 |
|  | 840 | 449 | 173 | 16 | 12 | 625 |
|  | 8 | 439 | 43 | 13 | 11 | 60 |
|  | 33 | 321 | 90 | 19 | 8 | 128 |
|  | 21 | 546 | 72 | 12 | 5 | 52 |
|  | 56 | 735 | 108 | 19 | 14 | 85 |
|  | 25 | 575 | 93 | 16 | 9 | 136 |
|  | 340 | 789 | 147 | 36 | 20 | 209 |
|  | 13 | 406 | 74 | 17 | 11 | 70 |
|  | 616 | 873 | 134 | 26 | 20 | 981 |
|  | 284 | 525 | 168 | 25 | 71 | 367 |
|  | 14 | 483 | 72 | 17 | 13 | 87 |
|  | 135 | 663 | 129 | 26 | 16 | 163 |
|  | 82 | 505 | 65 | 15 | 11 | 124 |
|  | 79 | 586 | 56 | 14 | 10 | 313 |
|  | 1,121 | 792 | 191 | 19 | 19 | 370 |
|  | 672 | 601 | 298 | 22 | 30 | 817 |
|  | 949 | 485 | 182 | 29 | 32 | 752 |
|  | 31 | 893 | 95 | 22 | 17 | 108 |
|  | 4,847 | 769 | 341 | 38 | 23 | 2,678 |
|  | 325 | 542 | 93 | 23 | 14 | 273 |
|  | 262 | 890 | 138 | 26 | 28 | 312 |
|  | 728 | 406 | 181 | 18 | 10 | 667 |
|  | 22 | 437 | 83 | 15 | 8 | 68 |
|  | 96 | 737 | 114 | 21 | 14 | 248 |
|  | 434 | 645 | 87 | 20 | 15 | 361 |
|  | 69 | 425 | 198 | 49 | 41 | 197 |
|  | 19 | 777 | 98 | 15 | 14 | 65 |
|  | Pb | Mn | Ba | Cr | Cu | Zn |
|  | ppm | pm | ppm | ppm | ppm | ppm |
|  | 793 | 662 | 303 | 23 | 31 | 1,087 |
|  | 1,903 | 819 | 581 | 28 | 34 | 1,565 |
|  | 68 | 505 | 70 | 16 | 7 | 136 |
|  | 39 | 518 | 82 | 24 | 24 | 99 |
|  | 816 | 456 | 176 | 18 | 10 | 390 |
|  | 31 | 544 | 64 | 30 | 42 | 77 |
|  | 20 | 526 | 79 | 16 | 9 | 30 |
|  | 52 | 562 | 98 | 16 | 14 | 186 |
|  | 28 | 480 | 58 | 12 | 6 | 63 |
|  | 59 | 337 | 86 | 16 | 9 | 105 |
|  | 53 | 479 | 72 | 14 | 8 | 90 |
|  | 80 | 347 | 63 | 14 | 9 | 283 |
|  | 3,433 | 560 | 181 | 22 | 11 | 2,133 |
|  | 60 | 283 | 56 | 14 | 6 | 88 |
|  | 68 | 1,359 | 132 | 25 | 20 | 185 |
|  | 23 | 320 | 66 | 16 | 11 | 67 |
|  | 58 | 521 | 61 | 11 | 6 | 60 |
|  | 6 | 591 | 86 | 16 | 364 | 73 |
|  | 55 | 594 | 94 | 17 | 8 | 89 |
|  | 427 | 326 | 136 | 12 | 10 | 276 |
|  | 1,200 | 435 | 87 | 17 | 54 | 502 |
|  | 296 | 511 | 93 | 21 | 40 | 254 |
|  | 5,739 | 374 | 78 | 19 | 7 | 1,222 |
|  | 407 | 698 | 102 | 20 | 9 | 332 |
|  | 995 | 457 | 113 | 16 | 8 | 427 |
|  | 111 | 581 | 171 | 29 | 27 | 165 |
|  | 150 | 567 | 139 | 27 | 33 | 349 |
|  | 140 | 580 | 202 | 28 | 27 | 342 |
|  | 174 | 520 | 192 | 32 | 49 | 343 |
|  | 268 | 452 | 150 | 31 | 82 | 278 |
|  | 183 | 474 | 139 | 28 | 45 | 286 |
|  | 158 | 581 | 126 | 26 | 36 | 195 |
|  | 112 | 555 | 136 | 27 | 37 | 270 |
|  | 1,510 | 651 | 620 | 33 | 56 | 1,630 |
|  | 439 | 602 | 215 | 28 | 99 | 1,000 |
|  | 602 | 447 | 266 | 33 | 322 | 739 |
|  | 288 | 501 | 132 | 22 | 30 | 479 |
|  | 217 | 601 | 151 | 28 | 34 | 289 |
|  | 1,970 | 525 | 600 | 36 | 52 | 1,760 |
|  | 224 | 522 | 137 | 31 | 67 | 379 |
|  | Pb | Mn | Ba | Cr | Cu | Zn |
|  | ppm | pm | ppm | ppm | ppm | ppm |
|  | 77 | 506 | 125 | 22 | 65 | 320 |
|  | 118 | 468 | 114 | 24 | 32 | 180 |
|  | 299 | 645 | 146 | 28 | 39 | 387 |
|  | 407 | 661 | 183 | 33 | 45 | 323 |
|  | 149 | 788 | 136 | 27 | 30 | 195 |
|  | 387 | 503 | 213 | 31 | 156 | 791 |
|  | 157 | 648 | 118 | 31 | 38 | 266 |
|  | 53 | 630 | 103 | 24 | 23 | 97 |
|  | 240 | 899 | 192 | 28 | 42 | 278 |
|  | 230 | 909 | 167 | 24 | 43 | 445 |
|  | 169 | 823 | 153 | 24 | 70 | 247 |
|  | 168 | 1,220 | 156 | 25 | 24 | 156 |
|  | 761 | 715 | 143 | 49 | 73 | 1,120 |
|  | 3,710 | 1,070 | 1,110 | 28 | 37 | 1,930 |
|  | 521 | 1,150 | 206 | 37 | 38 | 1,040 |
|  | 2,120 | 497 | 547 | 249 | 84 | 827 |
|  | 842 | 530 | 273 | 52 | 39 | 713 |
|  | 22 | 607 | 126 | 26 | 22 | 101 |
|  | 23 | 620 | 144 | 34 | 24 | 89 |
|  | 17 | 599 | 110 | 24 | 43 | 85 |
|  | 196 | 840 | 163 | 22 | 31 | 250 |
|  | 397 | 733 | 142 | 25 | 28 | 387 |
|  | 5,100 | 737 | 810 | 51 | 51 | 3,250 |
|  | 597 | 880 | 238 | 25 | 31 | 585 |
|  | 30 | 628 | 122 | 25 | 19 | 181 |
|  | 57 | 726 | 128 | 30 | 32 | 218 |
|  | 70 | 777 | 128 | 24 | 29 | 133 |
|  | 82 | 603 | 109 | 26 | 32 | 181 |
|  | 360 | 843 | 218 | 32 | 61 | 733 |
|  | 890 | 866 | 200 | 22 | 36 | 512 |
|  | 15 | 505 | 88 | 26 | 24 | 87 |
|  | 14 | 637 | 124 | 25 | 30 | 94 |
|  | 309 | 479 | 104 | 28 | 35 | 1,041 |
|  | 842 | 882 | 220 | 50 | 61 | 547 |
|  | 31 | 734 | 120 | 13 | 28 | 72 |
|  | 208 | 590 | 138 | 16 | 10 | 156 |
|  | 429 | 446 | 60 | 15 | 17 | 969 |
|  | 3,007 | 665 | 69 | 16 | 19 | 797 |
|  | 422 | 346 | 93 | 15 | 8 | 492 |
|  | 3,895 | 513 | 81 | 13 | 22 | 1,495 |
|  | Pb | Mn | Ba | Cr | Cu | Zn |
|  | ppm | pm | ppm | ppm | ppm | ppm |
|  | 914 | 496 | 77 | 13 | 10 | 942 |
|  | 1,243 | 290 | 172 | 19 | 221 | 956 |
|  | 6,496 | 1,082 | 256 | 34 | 224 | 3,534 |
|  | 1,281 | 607 | 140 | 17 | 27 | 1,560 |
|  | 1,507 | 398 | 240 | 18 | 15 | 810 |
|  | 597 | 784 | 120 | 24 | 118 | 1,071 |
|  | 708 | 636 | 151 | 18 | 12 | 353 |
|  | 101 | 650 | 110 | 18 | 140 | 151 |
|  | 54 | 873 | 98 | 35 | 8 | 251 |
|  | 1,143 | 541 | 145 | 19 | 25 | 1,011 |
|  | 7,102 | 720 | 191 | 33 | 24 | 3,557 |
|  | 139 | 460 | 116 | 18 | 12 | 120 |
|  | 8,816 | 210 | 70 | 13 | 6 | 1,860 |
|  | 6,461 | 255 | 115 | 15 | 18 | 1,288 |
|  | 352 | 537 | 80 | 23 | 17 | 214 |
|  | 53 | 592 | 50 | 13 | 15 | 86 |
|  | 32 | 522 | 72 | 17 | 10 | 60 |
|  | 868 | 777 | 144 | 24 | 28 | 425 |
|  | 57 | 512 | 98 | 19 | 15 | 81 |
|  | 178 | 649 | 162 | 31 | 25 | 196 |
|  | 205 | 483 | 120 | 22 | 20 | 495 |
|  | 500 | 973 | 161 | 27 | 33 | 386 |
|  | 1,143 | 541 | 145 | 19 | 25 | 1,011 |
|  | 7,102 | 720 | 191 | 33 | 24 | 3,557 |
|  | 139 | 460 | 116 | 18 | 12 | 120 |
|  | 195 | 488 | 75 | 14 | 9 | 136 |
|  | 512 | 556 | 125 | 19 | 14 | 367 |
|  | 219 | 676 | 111 | 14 | 18 | 525 |
|  | 616 | 699 | 133 | 20 | 16 | 442 |
|  | 282 | 802 | 102 | 22 | 12 | 307 |
|  | 1,152 | 857 | 132 | 23 | 76 | 2,191 |
|  | 360 | 767 | 119 | 18 | 11 | 420 |
|  | 584 | 1,199 | 136 | 17 | 47 | 3,814 |
|  | 282 | 887 | 129 | 17 | 22 | 203 |
|  | 654 | 757 | 89 | 18 | 20 | 416 |
|  | 100 | 569 | 86 | 17 | 13 | 217 |
|  | 139 | 647 | 67 | 3 | 4 | 32 |
|  | 145 | 641 | 67 | 4 | 4 | 32 |
|  | 147 | 363 | 61 | 4 | 3 | 27 |
|  | 638 | 370 | 102 | 6 | 11 | 1,044 |
|  | Pb | Mn | Ba | Cr | Cu | Zn |
|  | ppm | pm | ppm | ppm | ppm | ppm |
|  | 408 | 554 | 140 | 5 | 61 | 276 |
|  | 1,227 | 839 | 128 | 17 | 44 | 803 |
|  | 148 | 761 | 103 | 13 | 11 | 190 |
|  | 332 | 745 | 148 | 15 | 28 | 478 |
|  | 465 | 758 | 113 | 12 | 17 | 541 |
|  | 1,045 | 730 | 103 | 13 | 17 | 809 |
|  | 1,154 | 739 | 187 | 17 | 18 | 691 |
|  | 349 | 720 | 118 | 13 | 19 | 192 |
|  | 231 | 847 | 93 | 14 | 17 | 207 |
|  | 685 | 878 | 169 | 20 | 35 | 344 |
|  | 1,796 | 894 | 105 | 25 | 31 | 1,349 |
|  | 189 | 909 | 135 | 18 | 75 | 207 |
|  | 1,324 | 746 | 166 | 22 | 19 | 1,318 |
|  | 298 | 937 | 126 | 16 | 19 | 489 |
|  | 322 | 626 | 98 | 13 | 19 | 281 |
|  | 903 | 778 | 135 | 20 | 51 | 966 |
|  | 174 | 977 | 90 | 14 | 12 | 110 |
|  | 538 | 519 | 133 | 27 | 1,469 | 1,147 |
|  | 34 | 417 | 42 | 8 | 5 | 57 |
|  | 14 | 326 | 48 | 9 | 3 | 86 |
|  | 10 | 132 | 31 | 9 | 2 | 65 |
|  | 99 | 749 | 55 | 12 | 12 | 122 |
|  | 1,738 | 930 | 193 | 21 | 63 | 772 |
|  | 23 | 665 | 58 | 12 | 4 | 49 |
|  | 6,253 | 555 | 85 | 26 | 43 | 2,707 |
|  | 1,173 | 647 | 195 | 13 | 35 | 813 |
|  | 516 | 1,086 | 116 | 19 | 19 | 519 |
|  | 2,219 | 1,086 | 265 | 24 | 32 | 1,230 |
|  |  |  |  |  |  |  |
| Yard |  |  |  |  |  |  |
|  | 272 | 347 | 77 | 15 | 11 | 121 |
|  | 100 | 245 | 86 | 16 | 13 | 134 |
|  | 97 | 276 | 66 | 12 | 6 | 130 |
|  | 80 | 100 | 58 | 10 | 6 | 95 |
|  | 20 | 312 | 63 | 7 | 3 | 34 |
|  | 32 | 619 | 122 | 13 | 23 | 67 |
|  | 30 | 366 | 80 | 8 | 5 | 43 |
|  | 26 | 956 | 55 | 14 | 6 | 63 |
|  | 24 | 525 | 47 | 16 | 8 | 72 |
|  | 23 | 695 | 50 | 21 | 8 | 55 |
|  | Pb | Mn | Ba | Cr | Cu | Zn |
|  | ppm | pm | ppm | ppm | ppm | ppm |
|  | 88 | 428 | 92 | 18 | 16 | 158 |
|  | 470 | 444 | 223 | 19 | 19 | 529 |
|  | 150 | 408 | 142 | 20 | 17 | 253 |
|  | 21 | 512 | 101 | 10 | 10 | 65 |
|  | 6 | 361 | 50 | 12 | 12 | 54 |
|  | 9 | 282 | 92 | 17 | 13 | 69 |
|  | 27 | 547 | 68 | 18 | 9 | 72 |
|  | 25 | 492 | 72 | 20 | 12 | 76 |
|  | 32 | 523 | 72 | 22 | 13 | 81 |
|  | 26 | 550 | 66 | 18 | 9 | 73 |
|  | 37 | 290 | 58 | 11 | 4 | 52 |
|  | 58 | 391 | 73 | 16 | 9 | 150 |
|  | 63 | 409 | 93 | 20 | 13 | 181 |
|  | 55 | 480 | 92 | 18 | 11 | 160 |
|  | 2,064 | 748 | 131 | 18 | 18 | 639 |
|  | 1,366 | 889 | 111 | 18 | 10 | 624 |
|  | 1,148 | 474 | 77 | 12 | 4 | 466 |
|  | 432 | 846 | 243 | 21 | 44 | 379 |
|  | 240 | 948 | 176 | 20 | 25 | 227 |
|  | 384 | 1,050 | 203 | 21 | 23 | 272 |
|  | 93 | 1,130 | 170 | 31 | 41 | 282 |
|  | 143 | 1,170 | 174 | 28 | 27 | 350 |
|  | 137 | 948 | 201 | 33 | 43 | 285 |
|  | 242 | 882 | 254 | 33 | 62 | 691 |
|  | 84 | 840 | 173 | 32 | 23 | 167 |
|  | 52 | 868 | 125 | 34 | 21 | 625 |
|  | 29 | 833 | 118 | 29 | 20 | 530 |
|  | 29 | 879 | 131 | 32 | 26 | 258 |
|  | 40 | 612 | 138 | 26 | 34 | 314 |
|  | 237 | 1,010 | 185 | 25 | 35 | 286 |
|  | 193 | 897 | 170 | 30 | 37 | 286 |
|  | 478 | 878 | 199 | 23 | 31 | 596 |
|  | 42 | 726 | 75 | 19 | 14 | 78 |
|  | 26 | 755 | 74 | 16 | 7 | 61 |
|  | 35 | 617 | 77 | 23 | 14 | 84 |
|  | 44 | 678 | 165 | 21 | 13 | 33 |
|  | 44 | 657 | 92 | 19 | 9 | 95 |
|  | 23 | 541 | 80 | 17 | 8 | 89 |
|  | 20 | 668 | 97 | 19 | 8 | 95 |
|  | 4 | 696 | 125 | 24 | 11 | 76 |
|  | Pb | Mn | Ba | Cr | Cu | Zn |
|  | ppm | pm | ppm | ppm | ppm | ppm |
|  | 4 | 374 | 77 | 27 | 16 | 263 |
|  | 7 | 575 | 104 | 32 | 19 | 238 |
|  | 7 | 568 | 102 | 23 | 12 | 124 |
|  | 39 | 450 | 92 | 21 | 16 | 177 |
|  | 6 | 420 | 44 | 14 | 9 | 49 |
|  | 7 | 490 | 48 | 15 | 7 | 48 |
|  | 7 | 559 | 56 | 13 | 8 | 51 |
|  | 21 | 240 | 54 | 8 | 3 | 35 |
|  | 17 | 207 | 38 | 13 | 3 | 139 |
|  | 20 | 414 | 65 | 12 | 8 | 148 |
|  | 20 | 287 | 48 | 7 | 2 | 56 |
|  | 46 | 406 | 64 | 12 | 6 | 122 |
|  | 204 | 585 | 88 | 15 | 9 | 137 |
|  | 161 | 458 | 70 | 14 | 13 | 129 |
|  | 127 | 469 | 74 | 16 | 9 | 156 |
|  | 203 | 586 | 73 | 13 | 11 | 193 |
|  | 35 | 375 | 69 | 13 | 5 | 68 |
|  | 33 | 323 | 53 | 11 | 5 | 83 |
|  | 43 | 380 | 68 | 14 | 6 | 68 |
|  | 345 | 867 | 88 | 13 | 13 | 263 |
|  | 212 | 1,121 | 112 | 13 | 11 | 194 |
|  | 329 | 1,153 | 121 | 16 | 14 | 272 |
|  | 21 | 908 | 139 | 35 | 19 | 96 |
|  | 16 | 564 | 100 | 48 | 35 | 387 |
|  | 18 | 594 | 108 | 27 | 31 | 269 |
|  | 21 | 667 | 111 | 27 | 19 | 147 |
|  | 63 | 517 | 110 | 29 | 32 | 234 |
|  | 35 | 489 | 89 | 20 | 14 | 87 |
|  | 37 | 460 | 82 | 22 | 15 | 83 |
|  | 121 | 391 | 139 | 33 | 47 | 188 |
|  | 52 | 274 | 58 | 11 | 6 | 63 |
|  | 13 | 393 | 67 | 13 | 7 | 58 |
|  | 24 | 563 | 73 | 13 | 11 | 100 |
|  | 21 | 660 | 73 | 13 | 7 | 64 |
|  | 17 | 749 | 93 | 35 | 29 | 97 |
|  | 24 | 892 | 114 | 67 | 35 | 118 |
|  | 31 | 1,416 | 124 | 45 | 72 | 123 |
|  | 10 | 293 | 54 | 13 | 8 | 25 |
|  | 21 | 712 | 93 | 20 | 13 | 44 |
|  | 20 | 578 | 97 | 20 | 11 | 44 |
|  | Pb | Mn | Ba | Cr | Cu | Zn |
|  | ppm | pm | ppm | ppm | ppm | ppm |
|  | 357 | 511 | 82 | 13 | 13 | 241 |
|  | 242 | 378 | 65 | 12 | 11 | 153 |
|  | 9 | 890 | 75 | 13 | 7 | 54 |
|  | 13 | 676 | 114 | 18 | 11 | 81 |
|  | 15 | 706 | 91 | 15 | 9 | 73 |
|  | 15 | 463 | 89 | 18 | 10 | 76 |
|  | 13 | 440 | 90 | 21 | 13 | 83 |
|  | 25 | 578 | 72 | 18 | 5 | 51 |
|  | 17 | 422 | 72 | 9 | 2 | 50 |
|  | 23 | 565 | 78 | 9 | 2 | 54 |
|  | 15 | 1,352 | 175 | 51 | 52 | 80 |
|  | 17 | 1,005 | 137 | 19 | 11 | 83 |
|  | 17 | 950 | 170 | 27 | 16 | 77 |
|  | 224 | 569 | 85 | 15 | 15 | 250 |
|  | 14 | 381 | 72 | 21 | 32 | 81 |
|  | 125 | 869 | 119 | 36 | 42 | 143 |
|  | 427 | 531 | 157 | 31 | 47 | 446 |
|  | 760 | 491 | 156 | 21 | 25 | 823 |
|  | 285 | 505 | 122 | 21 | 20 | 798 |
|  | 103 | 377 | 61 | 11 | 6 | 83 |
|  | 118 | 258 | 61 | 10 | 16 | 180 |
|  | 215 | 291 | 61 | 10 | 4 | 131 |
|  | 393 | 435 | 111 | 18 | 16 | 303 |
|  | 130 | 471 | 65 | 12 | 8 | 114 |
|  | 845 | 440 | 157 | 26 | 27 | 621 |
|  | 155 | 247 | 75 | 13 | 8 | 140 |
|  | 55 | 393 | 61 | 11 | 5 | 65 |
|  | 185 | 395 | 76 | 12 | 6 | 156 |
|  | 56 | 395 | 86 | 17 | 8 | 83 |
|  | 75 | 579 | 105 | 16 | 7 | 90 |
|  | 188 | 575 | 123 | 29 | 29 | 188 |
|  | 469 | 1,104 | 215 | 28 | 30 | 261 |
|  | 275 | 1,103 | 159 | 29 | 26 | 210 |
|  | 171 | 1,052 | 119 | 20 | 23 | 142 |
|  | 60 | 281 | 52 | 6 | 4 | 83 |
|  | 335 | 357 | 91 | 10 | 8 | 176 |
|  | 621 | 403 | 166 | 12 | 11 | 421 |
|  | 276 | 449 | 118 | 13 | 9 | 259 |
|  | 296 | 511 | 93 | 21 | 40 | 254 |
|  | 238 | 406 | 170 | 13 | 8 | 210 |
|  | Pb | Mn | Ba | Cr | Cu | Zn |
|  | ppm | pm | ppm | ppm | ppm | ppm |
|  | 261 | 477 | 111 | 13 | 7 | 205 |
|  | 561 | 623 | 83 | 18 | 66 | 197 |
|  | 419 | 538 | 115 | 12 | 11 | 255 |
|  | 251 | 400 | 124 | 13 | 11 | 216 |
|  | 52 | 363 | 138 | 19 | 33 | 125 |
|  | 437 | 636 | 167 | 27 | 37 | 897 |
|  | 226 | 553 | 106 | 24 | 28 | 297 |
|  | 60 | 784 | 130 | 23 | 28 | 114 |
|  | 145 | 762 | 176 | 28 | 47 | 260 |
|  | 743 | 540 | 387 | 33 | 82 | 780 |
|  | 208 | 394 | 113 | 19 | 30 | 179 |
|  | 319 | 533 | 216 | 27 | 65 | 330 |
|  | 684 | 566 | 282 | 25 | 69 | 527 |
|  | 482 | 572 | 300 | 23 | 37 | 425 |
|  | 59 | 335 | 39 | 10 | 12 | 116 |
|  | 75 | 344 | 36 | 10 | 17 | 127 |
|  | 123 | 287 | 38 | 8 | 5 | 141 |
|  | 84 | 318 | 39 | 10 | 11 | 130 |
|  | 163 | 240 | 42 | 8 | 7 | 150 |
|  | 50 | 227 | 28 | 9 | 3 | 102 |
|  | 68 | 347 | 38 | 10 | 14 | 130 |
|  | 68 | 345 | 36 | 10 | 12 | 118 |
|  | 979 | 529 | 209 | 16 | 40 | 1,043 |
|  | 223 | 367 | 75 | 18 | 13 | 275 |
|  | 715 | 516 | 198 | 21 | 15 | 994 |
|  | 173 | 364 | 75 | 16 | 9 | 163 |
|  | 341 | 594 | 97 | 19 | 17 | 255 |
|  | 446 | 648 | 127 | 17 | 9 | 312 |
|  | 2,258 | 642 | 179 | 21 | 17 | 892 |
|  | 1,862 | 780 | 268 | 17 | 22 | 646 |
|  | 232 | 412 | 63 | 14 | 7 | 155 |
|  | 430 | 505 | 111 | 20 | 36 | 363 |
|  | 135 | 463 | 69 | 18 | 11 | 140 |
|  | 140 | 571 | 82 | 17 | 11 | 224 |
|  | 272 | 397 | 105 | 16 | 15 | 229 |
|  | 248 | 424 | 91 | 16 | 16 | 247 |
|  | 199 | 397 | 85 | 17 | 13 | 246 |
|  | 236 | 394 | 135 | 18 | 22 | 357 |
|  | 995 | 381 | 115 | 27 | 97 | 1,085 |
|  | 335 | 533 | 102 | 21 | 64 | 543 |
|  | Pb | Mn | Ba | Cr | Cu | Zn |
|  | ppm | pm | ppm | ppm | ppm | ppm |
|  | 567 | 583 | 80 | 17 | 11 | 224 |
|  | 1,796 | 428 | 152 | 22 | 14 | 450 |
|  | 181 | 615 | 67 | 13 | 10 | 116 |
|  | 145 | 563 | 77 | 15 | 9 | 136 |
|  | 145 | 568 | 64 | 12 | 10 | 109 |
|  | 295 | 772 | 92 | 20 | 13 | 291 |
|  | 125 | 542 | 64 | 15 | 9 | 133 |
|  | 301 | 446 | 97 | 15 | 10 | 187 |
|  | 284 | 570 | 86 | 16 | 13 | 202 |
|  | 1,548 | 611 | 149 | 36 | 436 | 922 |
|  | 689 | 681 | 143 | 32 | 26 | 517 |
|  | 448 | 503 | 119 | 24 | 24 | 370 |
|  | 640 | 599 | 153 | 34 | 29 | 506 |
|  | 762 | 591 | 148 | 31 | 26 | 848 |
|  | 209 | 570 | 142 | 33 | 28 | 378 |
|  | 972 | 509 | 216 | 29 | 34 | 721 |
|  | 354 | 527 | 150 | 28 | 28 | 368 |
|  | 300 | 543 | 125 | 27 | 25 | 396 |
|  | 1,659 | 568 | 265 | 32 | 32 | 1,421 |
|  | 629 | 568 | 160 | 26 | 25 | 553 |
|  | 791 | 498 | 260 | 20 | 48 | 708 |
|  | 826 | 526 | 269 | 21 | 45 | 701 |
|  | 255 | 453 | 143 | 21 | 40 | 378 |
|  | 739 | 550 | 182 | 31 | 40 | 536 |
|  | 24 | 568 | 54 | 12 | 11 | 76 |
|  | 10 | 676 | 56 | 12 | 8 | 67 |
|  | 9 | 684 | 64 | 14 | 10 | 72 |
|  | 11 | 691 | 52 | 13 | 7 | 58 |
|  | 9 | 655 | 49 | 12 | 6 | 53 |
|  | 9 | 695 | 45 | 11 | 6 | 50 |
|  | 11 | 896 | 65 | 12 | 8 | 66 |
|  | 6 | 1,138 | 112 | 19 | 15 | 101 |
|  | 21 | 609 | 53 | 11 | 10 | 73 |
|  | 214 | 695 | 96 | 15 | 25 | 195 |
|  | 239 | 883 | 120 | 18 | 25 | 183 |
|  | 499 | 508 | 112 | 15 | 87 | 350 |
|  | 6,619 | 794 | 226 | 46 | 24 | 2,516 |
|  | 1,838 | 558 | 256 | 22 | 17 | 1,199 |
|  | 5,325 | 778 | 278 | 44 | 33 | 3,483 |
|  | 507 | 890 | 198 | 28 | 23 | 444 |
|  | Pb | Mn | Ba | Cr | Cu | Zn |
|  | ppm | pm | ppm | ppm | ppm | ppm |
|  | 325 | 816 | 160 | 22 | 80 | 302 |
|  | 542 | 866 | 175 | 20 | 28 | 450 |
|  | 413 | 711 | 156 | 17 | 18 | 279 |
|  | 303 | 885 | 147 | 25 | 32 | 284 |
|  | 275 | 799 | 150 | 24 | 29 | 249 |
|  | 329 | 1,012 | 155 | 25 | 25 | 264 |
|  | 374 | 1,067 | 162 | 23 | 44 | 244 |
|  | 214 | 841 | 166 | 26 | 25 | 234 |
|  | 159 | 847 | 131 | 22 | 20 | 153 |
|  | 371 | 834 | 190 | 14 | 13 | 189 |
|  | 622 | 521 | 87 | 12 | 8 | 303 |
|  | 87 | 820 | 103 | 11 | 11 | 98 |
|  | 568 | 751 | 181 | 19 | 57 | 395 |
|  | 866 | 655 | 153 | 22 | 33 | 466 |
|  | 398 | 678 | 131 | 16 | 29 | 374 |
|  | 1,430 | 529 | 220 | 25 | 54 | 1,562 |
|  | 2,341 | 641 | 190 | 44 | 82 | 946 |
|  | 499 | 685 | 212 | 28 | 18 | 461 |
|  | 395 | 758 | 165 | 19 | 11 | 204 |
|  | 920 | 855 | 170 | 20 | 36 | 481 |
|  | 1,283 | 659 | 209 | 52 | 65 | 1,504 |
|  | 558 | 795 | 104 | 16 | 20 | 840 |
|  | 195 | 412 | 61 | 11 | 10 | 131 |
|  | 394 | 535 | 115 | 18 | 19 | 306 |
|  | 378 | 583 | 128 | 16 | 18 | 119 |
|  | 400 | 493 | 151 | 20 | 16 | 267 |
|  | 400 | 964 | 125 | 15 | 45 | 425 |
|  | 264 | 579 | 111 | 17 | 27 | 340 |
|  | 389 | 526 | 116 | 18 | 41 | 412 |
|  | 307 | 751 | 129 | 18 | 13 | 375 |
|  | 318 | 609 | 132 | 17 | 10 | 165 |
|  | 345 | 615 | 129 | 19 | 13 | 215 |
|  | 11 | 691 | 60 | 13 | 8 | 69 |
|  | 367 | 464 | 149 | 22 | 32 | 419 |
|  | 570 | 544 | 220 | 50 | 107 | 986 |
|  | 185 | 401 | 71 | 16 | 18 | 255 |
|  | 743 | 471 | 145 | 19 | 26 | 694 |
|  | 69 | 446 | 40 | 15 | 17 | 109 |
|  | 367 | 653 | 142 | 24 | 43 | 441 |
|  | 563 | 513 | 224 | 28 | 72 | 672 |
|  | Pb | Mn | Ba | Cr | Cu | Zn |
|  | ppm | pm | ppm | ppm | ppm | ppm |
|  | 289 | 919 | 134 | 22 | 22 | 318 |
|  | 219 | 909 | 156 | 21 | 67 | 332 |
|  | 523 | 1,013 | 163 | 45 | 236 | 902 |
|  | 228 | 595 | 120 | 20 | 19 | 186 |
|  | 322 | 562 | 135 | 19 | 22 | 248 |
|  | 284 | 495 | 128 | 19 | 24 | 239 |
|  | 264 | 612 | 137 | 17 | 16 | 192 |
|  | 1,061 | 543 | 127 | 26 | 35 | 1,574 |
|  | 407 | 794 | 109 | 31 | 41 | 1,019 |
|  | 110 | 680 | 149 | 25 | 30 | 538 |
|  | 403 | 772 | 143 | 44 | 69 | 1,617 |
|  | 113 | 781 | 106 | 17 | 9 | 130 |
|  | 161 | 509 | 100 | 20 | 15 | 152 |
|  | 438 | 450 | 155 | 20 | 20 | 643 |
|  | 1,181 | 595 | 207 | 40 | 58 | 1,231 |
|  | 52 | 388 | 39 | 8 | 3 | 95 |
|  | 14 | 359 | 36 | 7 | 3 | 65 |
|  | 20 | 395 | 29 | 5 | 2 | 59 |
|  | 203 | 283 | 87 | 10 | 7 | 304 |
|  | 206 | 242 | 74 | 10 | 10 | 347 |
|  | 115 | 258 | 48 | 8 | 5 | 182 |
|  | 100 | 284 | 45 | 9 | 4 | 183 |
|  | 5 | 430 | 41 | 8 | 3 | 56 |
|  | 18 | 219 | 29 | 8 | 4 | 50 |
|  | 671 | 674 | 239 | 26 | 46 | 702 |
|  | 1,639 | 621 | 114 | 18 | 20 | 591 |
|  | 735 | 801 | 88 | 17 | 9 | 300 |
|  | 165 | 703 | 78 | 14 | 8 | 98 |
|  | 36 | 853 | 67 | 15 | 5 | 60 |
|  | 247 | 567 | 66 | 14 | 10 | 130 |
|  | 1,233 | 543 | 106 | 15 | 20 | 752 |
|  | 275 | 566 | 87 | 19 | 15 | 278 |
|  | 482 | 541 | 177 | 17 | 11 | 265 |
|  | 32 | 626 | 61 | 14 | 4 | 60 |
|  | 158 | 666 | 79 | 28 | 20 | 153 |
|  | 849 | 534 | 88 | 18 | 20 | 457 |
|  | 553 | 653 | 110 | 14 | 12 | 221 |
|  | 3,949 | 559 | 177 | 15 | 13 | 892 |
|  | 909 | 632 | 108 | 15 | 17 | 335 |
|  | 2,200 | 530 | 93 | 15 | 12 | 599 |
|  | Pb | Mn | Ba | Cr | Cu | Zn |
|  | ppm | pm | ppm | ppm | ppm | ppm |
|  | 320 | 855 | 225 | 26 | 82 | 332 |
|  | 228 | 667 | 160 | 24 | 56 | 215 |
|  | 209 | 774 | 142 | 23 | 53 | 263 |
|  | 388 | 909 | 192 | 24 | 78 | 314 |
|  | 278 | 716 | 155 | 22 | 59 | 248 |
|  | 192 | 721 | 149 | 27 | 71 | 247 |
|  | 425 | 952 | 152 | 19 | 25 | 309 |
|  | 922 | 819 | 191 | 19 | 19 | 554 |
|  | 892 | 1,105 | 182 | 22 | 22 | 463 |
|  | 109 | 873 | 110 | 21 | 16 | 149 |
|  | 756 | 757 | 175 | 23 | 22 | 915 |
|  | 158 | 941 | 116 | 20 | 12 | 159 |
|  | 106 | 891 | 97 | 21 | 16 | 226 |
|  | 239 | 1,062 | 119 | 26 | 20 | 211 |
|  | 292 | 981 | 126 | 21 | 15 | 265 |
|  | 182 | 952 | 116 | 32 | 19 | 186 |
|  | 137 | 804 | 114 | 19 | 17 | 180 |
|  | 104 | 954 | 109 | 22 | 12 | 166 |
|  | 105 | 974 | 110 | 21 | 13 | 151 |
|  | 191 | 932 | 124 | 20 | 15 | 172 |
|  | 158 | 952 | 126 | 25 | 20 | 193 |
|  | 135 | 1,027 | 108 | 22 | 15 | 147 |
|  | 126 | 977 | 109 | 22 | 12 | 149 |
|  | 127 | 934 | 101 | 19 | 11 | 135 |
|  | 178 | 871 | 109 | 21 | 11 | 148 |
|  | 165 | 895 | 123 | 20 | 15 | 156 |
|  | 166 | 1,020 | 108 | 19 | 13 | 146 |
|  | 3,168 | 817 | 268 | 18 | 15 | 1,321 |
|  | 765 | 664 | 208 | 26 | 152 | 1,193 |
|  | 272 | 679 | 176 | 27 | 39 | 292 |
|  | 236 | 573 | 102 | 16 | 9 | 372 |
|  | 124 | 537 | 59 | 20 | 18 | 100 |
|  | 78 | 449 | 86 | 25 | 19 | 150 |
|  | 864 | 1,015 | 110 | 25 | 35 | 621 |
|  | 41 | 581 | 71 | 21 | 20 | 96 |
|  | 292 | 628 | 88 | 21 | 21 | 294 |
|  | 276 | 764 | 113 | 31 | 30 | 352 |
|  | 64 | 629 | 64 | 21 | 22 | 118 |
|  | 193 | 842 | 131 | 17 | 11 | 194 |
|  | 266 | 899 | 115 | 12 | 8 | 149 |
|  | Pb | Mn | Ba | Cr | Cu | Zn |
|  | ppm | pm | ppm | ppm | ppm | ppm |
|  | 61 | 1,050 | 151 | 42 | 23 | 103 |
|  | 100 | 1,070 | 163 | 37 | 31 | 158 |
|  | 223 | 1,010 | 214 | 35 | 45 | 346 |
|  | 248 | 970 | 185 | 27 | 32 | 287 |
|  | 526 | 1,090 | 314 | 41 | 58 | 480 |
|  | 612 | 1,090 | 405 | 42 | 87 | 698 |
|  | 263 | 1,040 | 258 | 32 | 33 | 312 |
|  | 214 | 1,120 | 235 | 35 | 32 | 270 |
|  | 199 | 1,110 | 228 | 40 | 56 | 264 |
|  | 172 | 1,020 | 170 | 51 | 34 | 192 |
|  | 537 | 1,080 | 328 | 46 | 53 | 396 |
|  | 276 | 942 | 226 | 38 | 56 | 280 |
|  | 110 | 1,110 | 179 | 32 | 30 | 166 |
|  | 357 | 1,160 | 261 | 41 | 48 | 334 |
|  | 542 | 1,120 | 370 | 53 | 70 | 466 |
|  | 87 | 1,050 | 172 | 37 | 29 | 133 |
|  | 305 | 1,210 | 255 | 52 | 42 | 298 |
|  | 2,570 | 1,280 | 338 | 46 | 45 | 294 |
|  | 415 | 1,110 | 198 | 40 | 94 | 279 |
|  | 170 | 960 | 168 | 28 | 79 | 277 |
|  | 228 | 980 | 175 | 35 | 54 | 330 |
|  | 429 | 1,180 | 225 | 32 | 32 | 588 |
|  | 161 | 953 | 169 | 28 | 34 | 243 |
|  | 227 | 942 | 191 | 35 | 50 | 277 |
|  | 255 | 961 | 181 | 27 | 33 | 333 |
|  | 276 | 1,050 | 251 | 36 | 54 | 576 |
|  | 312 | 1,120 | 241 | 36 | 50 | 335 |
|  | 358 | 903 | 273 | 37 | 73 | 368 |
|  | 162 | 886 | 176 | 38 | 35 | 264 |
|  | 296 | 961 | 218 | 38 | 39 | 308 |
|  | 242 | 859 | 186 | 29 | 53 | 310 |
|  | 213 | 1,190 | 204 | 50 | 40 | 246 |
|  | 49 | 1,140 | 159 | 36 | 32 | 118 |
|  | 501 | 1,030 | 298 | 33 | 43 | 414 |
|  | 498 | 1,120 | 277 | 35 | 37 | 546 |
|  | 563 | 1,150 | 266 | 31 | 41 | 694 |
|  | 299 | 1,120 | 230 | 33 | 45 | 369 |
|  | 648 | 1,040 | 361 | 30 | 39 | 583 |
|  | 363 | 1,110 | 253 | 30 | 37 | 293 |
|  | 807 | 997 | 800 | 44 | 80 | 794 |
|  | Pb | Mn | Ba | Cr | Cu | Zn |
|  | ppm | pm | ppm | ppm | ppm | ppm |
|  | 334 | 1,130 | 203 | 28 | 29 | 264 |
|  | 1,550 | 1,170 | 521 | 33 | 47 | 873 |
|  | 189 | 1,160 | 201 | 48 | 46 | 243 |
|  | 368 | 824 | 196 | 27 | 40 | 311 |
|  | 728 | 1,190 | 377 | 32 | 27 | 791 |
|  | 409 | 946 | 215 | 32 | 48 | 365 |
|  | 149 | 593 | 132 | 45 | 30 | 143 |
|  | 949 | 834 | 221 | 27 | 38 | 480 |
|  | 666 | 1,120 | 377 | 37 | 61 | 682 |
|  | 544 | 938 | 269 | 36 | 43 | 457 |
|  | 2,180 | 981 | 455 | 28 | 42 | 1,570 |
|  | 494 | 957 | 278 | 35 | 56 | 384 |
|  | 560 | 1,120 | 288 | 33 | 38 | 439 |
|  | 168 | 1,240 | 182 | 35 | 24 | 159 |
|  | 265 | 1,100 | 223 | 37 | 58 | 268 |
|  | 423 | 1,170 | 261 | 32 | 31 | 399 |
|  | 353 | 1,260 | 219 | 52 | 35 | 326 |
|  | 533 | 1,040 | 262 | 34 | 54 | 457 |
|  | 1,380 | 997 | 398 | 31 | 53 | 681 |
|  | 201 | 1,260 | 182 | 26 | 21 | 167 |
|  | 269 | 868 | 201 | 38 | 38 | 274 |
|  | 656 | 1,220 | 245 | 31 | 33 | 378 |
|  | 798 | 1,100 | 303 | 29 | 28 | 396 |
|  | 263 | 955 | 185 | 27 | 42 | 315 |
|  | 283 | 1,030 | 195 | 28 | 44 | 351 |
|  | 773 | 924 | 308 | 27 | 42 | 824 |
|  | 108 | 1,100 | 175 | 30 | 27 | 177 |
|  | 1,350 | 982 | 623 | 26 | 140 | 809 |
|  | 113 | 873 | 246 | 31 | 32 | 188 |
|  | 957 | 698 | 1,200 | 38 | 48 | 895 |
|  | 267 | 1,080 | 277 | 32 | 48 | 421 |
|  | 324 | 1,100 | 229 | 29 | 33 | 310 |
|  | 75 | 641 | 127 | 18 | 18 | 99 |
|  | 498 | 998 | 285 | 30 | 54 | 472 |
|  | 228 | 902 | 191 | 24 | 24 | 283 |
|  | 240 | 689 | 136 | 23 | 25 | 189 |
|  | 269 | 1,070 | 193 | 29 | 36 | 265 |
|  | 293 | 757 | 165 | 24 | 32 | 296 |
|  | 644 | 604 | 182 | 21 | 30 | 205 |
|  | 241 | 802 | 189 | 26 | 35 | 291 |
|  | Pb | Mn | Ba | Cr | Cu | Zn |
|  | ppm | pm | ppm | ppm | ppm | ppm |
|  | 499 | 899 | 227 | 28 | 39 | 451 |
|  | 715 | 906 | 284 | 28 | 64 | 571 |
|  | 228 | 666 | 157 | 24 | 51 | 243 |
|  | 203 | 1,010 | 161 | 24 | 32 | 425 |
|  | 200 | 1,080 | 179 | 27 | 31 | 235 |
|  | 216 | 1,050 | 169 | 26 | 32 | 980 |
|  | 347 | 682 | 188 | 25 | 49 | 468 |
|  | 317 | 564 | 172 | 36 | 51 | 295 |
|  | 147 | 259 | 85 | 25 | 44 | 186 |
|  | 362 | 855 | 242 | 25 | 43 | 314 |
|  | 567 | 754 | 360 | 34 | 51 | 415 |
|  | 439 | 842 | 248 | 34 | 42 | 356 |
|  | 140 | 1,160 | 205 | 29 | 29 | 308 |
|  | 985 | 1,000 | 479 | 27 | 38 | 579 |
|  | 282 | 1,130 | 224 | 29 | 30 | 281 |
|  | 668 | 1,140 | 617 | 39 | 100 | 811 |
|  | 252 | 712 | 209 | 27 | 26 | 260 |
|  | 160 | 763 | 162 | 26 | 27 | 206 |
|  | 1,010 | 938 | 348 | 38 | 75 | 733 |
|  | 667 | 831 | 216 | 29 | 35 | 404 |
|  | 324 | 1,050 | 178 | 29 | 34 | 159 |
|  | 155 | 1,120 | 179 | 30 | 28 | 181 |
|  | > 5000 | 967 | 1,140 | 66 | 146 | 3,660 |
|  | 602 | 1,380 | 226 | 33 | 37 | 507 |
|  | 210 | 842 | 149 | 27 | 33 | 238 |
|  | 248 | 858 | 148 | 28 | 36 | 185 |
|  | 121 | 828 | 143 | 27 | 37 | 157 |
|  | 156 | 614 | 110 | 18 | 23 | 135 |
|  | 109 | 548 | 98 | 17 | 24 | 118 |
|  | 124 | 612 | 98 | 18 | 25 | 123 |
|  | 29 | 383 | 72 | 13 | 8 | 64 |
|  | 423 | 520 | 96 | 18 | 29 | 104 |
|  | 47 | 945 | 108 | 25 | 16 | 88 |
|  | 206 | 678 | 80 | 14 | 9 | 138 |
|  | 95 | 929 | 129 | 23 | 14 | 109 |
|  | 94 | 768 | 121 | 21 | 15 | 135 |
|  | 173 | 1,213 | 154 | 26 | 22 | 208 |
|  | 234 | 918 | 164 | 28 | 36 | 253 |
|  | 166 | 1,126 | 149 | 26 | 19 | 306 |
|  | 193 | 1,265 | 166 | 25 | 23 | 223 |
|  | Pb | Mn | Ba | Cr | Cu | Zn |
|  | ppm | pm | ppm | ppm | ppm | ppm |
|  | 117 | 657 | 132 | 25 | 21 | 130 |
|  | 73 | 911 | 136 | 23 | 15 | 119 |
|  | 169 | 1,194 | 161 | 28 | 23 | 211 |
|  | 138 | 1,137 | 108 | 20 | 19 | 202 |
|  | 10 | 665 | 55 | 14 | 10 | 45 |
|  | 17 | 1,079 | 88 | 12 | 11 | 70 |
|  | 9 | 564 | 52 | 14 | 11 | 60 |
|  | 75 | 513 | 162 | 29 | 21 | 258 |
|  | 183 | 458 | 115 | 23 | 13 | 143 |
|  | 141 | 491 | 137 | 40 | 17 | 218 |
|  | 97 | 801 | 114 | 24 | 21 | 139 |
|  | 108 | 851 | 96 | 20 | 19 | 129 |
|  | 102 | 833 | 109 | 22 | 18 | 159 |
|  | 169 | 778 | 124 | 22 | 22 | 210 |
|  | 139 | 911 | 117 | 18 | 20 | 168 |
|  | 289 | 733 | 149 | 23 | 24 | 331 |
|  | 231 | 881 | 146 | 25 | 22 | 247 |
|  | 286 | 868 | 164 | 30 | 31 | 436 |
|  | 193 | 898 | 139 | 24 | 21 | 226 |
|  | 60 | 1,435 | 137 | 29 | 18 | 306 |
|  | 42 | 1,543 | 124 | 24 | 15 | 117 |
|  | 63 | 1,810 | 173 | 32 | 27 | 152 |
|  | 48 | 982 | 118 | 27 | 19 | 145 |
|  | 514 | 1,060 | 330 | 31 | 71 | 749 |
|  | 312 | 941 | 249 | 27 | 49 | 472 |
|  | 600 | 1,060 | 329 | 32 | 88 | 940 |
|  | 329 | 1,020 | 197 | 29 | 49 | 551 |
|  | 246 | 1,000 | 185 | 27 | 46 | 443 |
|  | 398 | 864 | 192 | 25 | 42 | 447 |
|  | 1,360 | 1,090 | 277 | 36 | 101 | 2,070 |
|  | 313 | 934 | 283 | 32 | 70 | 570 |
|  | 421 | 776 | 234 | 24 | 93 | 525 |
|  | 20 | 311 | 138 | 19 | 34 | 99 |
|  | 16 | 320 | 141 | 19 | 37 | 96 |
|  | 86 | 856 | 189 | 41 | 31 | 197 |
|  | 142 | 728 | 109 | 25 | 30 | 253 |
|  | 103 | 647 | 75 | 25 | 24 | 126 |
|  | 728 | 729 | 151 | 27 | 133 | 476 |
|  | 557 | 507 | 164 | 18 | 15 | 392 |
|  | 151 | 551 | 227 | 17 | 13 | 418 |
|  | Pb | Mn | Ba | Cr | Cu | Zn |
|  | ppm | pm | ppm | ppm | ppm | ppm |
|  | 514 | 555 | 153 | 18 | 18 | 484 |
|  | 233 | 751 | 119 | 16 | 10 | 133 |
|  | 816 | 574 | 148 | 17 | 10 | 297 |
|  | 33 | 665 | 120 | 17 | 8 | 57 |
|  | 634 | 781 | 185 | 35 | 28 | 957 |
|  | 539 | 754 | 120 | 23 | 12 | 861 |
|  | 652 | 653 | 100 | 36 | 22 | 498 |
|  | 192 | 759 | 93 | 22 | 7 | 242 |
|  | 154 | 751 | 68 | 19 | 6 | 109 |
|  | 258 | 1,038 | 103 | 22 | 12 | 268 |
|  | 253 | 1,010 | 98 | 22 | 12 | 258 |
|  | 102 | 1,189 | 118 | 21 | 17 | 103 |
|  | 11 | 1,206 | 86 | 21 | 33 | 175 |
|  | 310 | 749 | 76 | 17 | 45 | 308 |
|  | 135 | 1,083 | 106 | 19 | 17 | 191 |
|  | 34 | 389 | 54 | 11 | 21 | 100 |
|  | 35 | 465 | 59 | 18 | 20 | 160 |
|  | 64 | 551 | 82 | 16 | 29 | 167 |
|  | 36 | 614 | 108 | 25 | 19 | 70 |
|  | 120 | 795 | 111 | 12 | 10 | 280 |
|  | 515 | 384 | 118 | 14 | 18 | 209 |
|  | 80 | 689 | 81 | 12 | 25 | 308 |
|  | 338 | 392 | 100 | 17 | 25 | 361 |
|  | 320 | 463 | 198 | 18 | 31 | 541 |
|  | 311 | 553 | 95 | 16 | 34 | 232 |
|  | 68 | 643 | 76 | 14 | 15 | 137 |
|  | 370 | 336 | 117 | 15 | 17 | 231 |
|  | 82 | 318 | 64 | 14 | 19 | 132 |
|  | 79 | 529 | 149 | 31 | 32 | 158 |
|  | 374 | 684 | 215 | 30 | 140 | 458 |
|  | 209 | 438 | 123 | 26 | 45 | 239 |
|  | 269 | 623 | 222 | 29 | 55 | 418 |
|  | 217 | 604 | 212 | 31 | 55 | 374 |
|  | 195 | 650 | 156 | 23 | 38 | 321 |
|  | 723 | 454 | 561 | 39 | 392 | 1,190 |
|  | 143 | 679 | 142 | 24 | 60 | 203 |
|  | 197 | 668 | 134 | 26 | 36 | 254 |
|  | 66 | 766 | 125 | 22 | 19 | 97 |
|  | 116 | 449 | 111 | 24 | 32 | 178 |
|  | 220 | 583 | 136 | 23 | 35 | 222 |
|  | Pb | Mn | Ba | Cr | Cu | Zn |
|  | ppm | pm | ppm | ppm | ppm | ppm |
|  | 110 | 721 | 137 | 27 | 31 | 216 |
|  | 88 | 764 | 124 | 25 | 25 | 146 |
|  | 106 | 489 | 142 | 26 | 47 | 218 |
|  | 157 | 577 | 133 | 21 | 38 | 239 |
|  | 230 | 630 | 183 | 27 | 53 | 285 |
|  | 34 | 639 | 129 | 32 | 31 | 116 |
|  | 32 | 595 | 146 | 31 | 36 | 120 |
|  | 38 | 534 | 124 | 25 | 26 | 99 |
|  | 57 | 839 | 154 | 26 | 28 | 119 |
|  | 163 | 751 | 210 | 22 | 35 | 191 |
|  | 136 | 841 | 162 | 24 | 41 | 180 |
|  | 121 | 784 | 154 | 26 | 27 | 157 |
|  | 31 | 676 | 127 | 23 | 32 | 150 |
|  | 70 | 931 | 153 | 29 | 29 | 326 |
|  | 21 | 670 | 123 | 14 | 16 | 85 |
|  | 68 | 906 | 165 | 37 | 31 | 143 |
|  | 192 | 1,170 | 175 | 29 | 59 | 388 |
|  | 573 | 828 | 112 | 13 | 18 | 359 |
|  | 572 | 845 | 215 | 22 | 40 | 400 |
|  | 879 | 552 | 163 | 16 | 21 | 488 |
|  | 406 | 579 | 134 | 14 | 15 | 200 |
|  | 150 | 542 | 88 | 13 | 8 | 127 |
|  | 350 | 500 | 119 | 15 | 14 | 194 |
|  | 4,400 | 845 | 88 | 27 | 47 | 1,967 |
|  | 636 | 818 | 122 | 14 | 14 | 635 |
|  | 215 | 705 | 91 | 14 | 9 | 145 |
|  | 951 | 616 | 107 | 15 | 15 | 343 |
|  | 1,289 | 774 | 130 | 51 | 1,332 | 1,070 |
|  | 408 | 558 | 78 | 14 | 18 | 474 |
|  | 1,368 | 826 | 51 | 35 | 119 | 917 |
|  | 513 | 514 | 81 | 24 | 18 | 343 |
|  | 200 | 472 | 93 | 9 | 9 | 142 |
|  | 246 | 496 | 102 | 9 | 8 | 143 |
|  | 20 | 9 | 1 | 1 | 1 | 10 |
|  | 772 | 512 | 201 | 34 | 77 | 409 |
|  | 564 | 336 | 119 | 15 | 71 | 316 |
|  | 934 | 369 | 159 | 30 | 73 | 584 |
|  | 253 | 590 | 142 | 19 | 14 | 165 |
|  | 295 | 574 | 128 | 21 | 17 | 163 |
|  | 151 | 534 | 102 | 18 | 11 | 122 |
|  | Pb | Mn | Ba | Cr | Cu | Zn |
|  | ppm | pm | ppm | ppm | ppm | ppm |
|  | 538 | 564 | 167 | 21 | 19 | 362 |
|  | 562 | 701 | 142 | 29 | 46 | 1,261 |
|  | 536 | 779 | 130 | 28 | 36 | 683 |
|  | 684 | 716 | 199 | 29 | 30 | 747 |
|  | 45 | 568 | 94 | 20 | 17 | 90 |
|  | 29 | 693 | 106 | 20 | 18 | 82 |
|  | 42 | 526 | 80 | 17 | 13 | 64 |
|  | 330 | 623 | 144 | 30 | 36 | 378 |
|  | 131 | 681 | 150 | 25 | 20 | 157 |
|  | 315 | 1,010 | 262 | 44 | 35 | 335 |
|  | 84 | 285 | 63 | 16 | 5 | 95 |
|  | 161 | 374 | 95 | 19 | 8 | 164 |
|  | 246 | 515 | 97 | 17 | 19 | 252 |
|  | 670 | 705 | 178 | 21 | 28 | 351 |
|  | 363 | 605 | 137 | 18 | 21 | 259 |
|  | 329 | 347 | 74 | 11 | 48 | 262 |
|  | 190 | 283 | 69 | 11 | 11 | 177 |
|  | 155 | 298 | 64 | 11 | 7 | 133 |
|  | 530 | 763 | 103 | 14 | 22 | 386 |
|  | 1,689 | 636 | 65 | 11 | 14 | 435 |
|  | 129 | 596 | 99 | 16 | 16 | 334 |
|  | 57 | 460 | 109 | 19 | 17 | 153 |
|  | 65 | 434 | 86 | 19 | 18 | 199 |
|  | 56 | 492 | 121 | 22 | 18 | 159 |
|  | 126 | 561 | 95 | 24 | 12 | 209 |
|  | 60 | 406 | 69 | 20 | 9 | 108 |
|  | 66 | 408 | 62 | 17 | 16 | 572 |
|  | 199 | 355 | 82 | 18 | 13 | 133 |
|  | 152 | 739 | 165 | 26 | 18 | 246 |
|  | 204 | 624 | 125 | 24 | 14 | 219 |
|  | 328 | 493 | 83 | 17 | 13 | 620 |
|  | 197 | 316 | 89 | 20 | 12 | 287 |
|  | 269 | 488 | 129 | 20 | 26 | 381 |
|  | 45 | 491 | 150 | 30 | 28 | 130 |
|  | 278 | 650 | 152 | 27 | 37 | 228 |
|  | 288 | 717 | 200 | 33 | 48 | 362 |
|  | 121 | 458 | 102 | 24 | 31 | 126 |
|  | 511 | 608 | 207 | 29 | 62 | 499 |
|  | 116 | 531 | 120 | 25 | 35 | 159 |
|  | 8 | 92 | 26 | 7 | 1 | 46 |
|  | Pb | Mn | Ba | Cr | Cu | Zn |
|  | ppm | pm | ppm | ppm | ppm | ppm |
|  | 6 | 85 | 29 | 8 | 2 | 43 |
|  | 145 | 764 | 64 | 14 | 12 | 253 |
|  | 64 | 783 | 90 | 22 | 20 | 181 |
|  | 54 | 865 | 84 | 30 | 11 | 100 |
|  | 110 | 1,185 | 132 | 21 | 24 | 285 |
|  | 75 | 1,006 | 104 | 24 | 17 | 534 |
|  | 33 | 659 | 95 | 18 | 19 | 171 |
|  | 31 | 855 | 120 | 14 | 6 | 78 |
|  | 17 | 666 | 87 | 21 | 17 | 74 |
|  | 1,174 | 2,597 | 439 | 50 | 82 | 889 |
|  | 139 | 1,278 | 123 | 17 | 15 | 119 |
|  | 369 | 978 | 172 | 26 | 21 | 412 |
|  | 82 | 843 | 106 | 26 | 34 | 137 |
|  | 204 | 961 | 112 | 23 | 24 | 164 |
|  | 59 | 983 | 101 | 19 | 15 | 109 |
|  | 311 | 843 | 108 | 23 | 18 | 156 |
|  |  |  |  |  |  |  |
|  | 92 | 712 | 140 | 11 | 18 | 115 |
|  | 191 | 626 | 113 | 14 | 11 | 774 |
|  | 91 | 610 | 86 | 13 | 7 | 129 |
|  | 112 | 677 | 93 | 11 | 10 | 128 |
|  | 27 | 394 | 98 | 30 | 22 | 93 |
|  | 78 | 714 | 133 | 23 | 26 | 210 |
|  | 75 | 385 | 70 | 28 | 23 | 137 |
|  | 79 | 698 | 124 | 23 | 22 | 190 |
|  | 41 | 639 | 156 | 17 | 47 | 112 |
|  | 201 | 595 | 124 | 22 | 27 | 1,010 |
|  | 33 | 824 | 88 | 19 | 10 | 88 |
|  | 37 | 986 | 111 | 62 | 11 | 93 |
|  | 132 | 629 | 87 | 5 | 4 | 64 |
|  | 400 | 558 | 151 | 6 | 15 | 237 |
|  | 485 | 671 | 121 | 5 | 24 | 233 |
|  | 284 | 936 | 140 | 5 | 11 | 231 |
|  | 120 | 440 | 43 | 9 | 9 | 91 |
|  | 106 | 733 | 85 | 13 | 12 | 130 |
|  | 122 | 634 | 81 | 15 | 14 | 219 |
|  | 176 | 807 | 89 | 15 | 17 | 206 |
|  | 155 | 556 | 49 | 13 | 15 | 140 |
|  | 513 | 855 | 152 | 24 | 23 | 597 |
|  | 202 | 530 | 83 | 17 | 6 | 193 |
|  | Pb | Mn | Ba | Cr | Cu | Zn |
|  | ppm | pm | ppm | ppm | ppm | ppm |
|  | 51 | 460 | 68 | 15 | 10 | 78 |
|  | 197 | 550 | 91 | 21 | 17 | 137 |
|  | 45 | 333 | 57 | 14 | 8 | 87 |
|  | 381 | 1,065 | 172 | 27 | 29 | 430 |
|  | 320 | 1,089 | 158 | 28 | 29 | 345 |
|  | 628 | 1,048 | 172 | 29 | 44 | 415 |
|  | 186 | 729 | 112 | 16 | 15 | 161 |
|  | 398 | 585 | 140 | 26 | 42 | 371 |
|  | 1,051 | 619 | 203 | 29 | 209 | 920 |
|  | 180 | 731 | 119 | 16 | 19 | 175 |
|  | 164 | 925 | 126 | 18 | 16 | 159 |
|  | 214 | 676 | 131 | 22 | 27 | 366 |
|  | 212 | 824 | 147 | 20 | 16 | 479 |
|  | 128 | 822 | 118 | 17 | 9 | 977 |
|  | 412 | 611 | 193 | 21 | 35 | 459 |
|  | 74 | 844 | 102 | 16 | 7 | 96 |
|  | 57 | 790 | 88 | 13 | 6 | 82 |
|  | 110 | 681 | 84 | 12 | 8 | 177 |
|  | 155 | 806 | 111 | 15 | 10 | 198 |
|  | 370 | 848 | 143 | 21 | 137 | 952 |
|  | 185 | 870 | 179 | 23 | 36 | 230 |
|  | 117 | 725 | 118 | 13 | 13 | 210 |
|  | 66 | 602 | 94 | 11 | 7 | 115 |
|  | 107 | 742 | 117 | 14 | 16 | 223 |
|  | 463 | 856 | 116 | 19 | 33 | 361 |
|  | 187 | 809 | 118 | 13 | 8 | 190 |
|  | 65 | 600 | 99 | 16 | 10 | 107 |
|  | 457 | 828 | 96 | 12 | 10 | 372 |
|  | 229 | 919 | 146 | 40 | 18 | 335 |
|  | 235 | 869 | 121 | 75 | 44 | 287 |
|  | 243 | 800 | 144 | 80 | 59 | 298 |
|  | 179 | 620 | 113 | 19 | 12 | 240 |
|  | 210 | 717 | 131 | 20 | 14 | 199 |
|  | 140 | 718 | 133 | 18 | 10 | 154 |
|  | 177 | 884 | 135 | 16 | 14 | 265 |
|  | 262 | 782 | 150 | 19 | 18 | 513 |
|  | 355 | 812 | 163 | 18 | 42 | 763 |
|  | 261 | 765 | 117 | 30 | 16 | 290 |
|  | 215 | 753 | 127 | 22 | 12 | 241 |
|  | 259 | 769 | 114 | 34 | 15 | 274 |
|  | Pb | Mn | Ba | Cr | Cu | Zn |
|  | ppm | pm | ppm | ppm | ppm | ppm |
|  | 698 | 1,073 | 155 | 16 | 36 | 654 |
|  | 520 | 1,011 | 145 | 18 | 27 | 458 |
|  | 514 | 1,141 | 151 | 18 | 28 | 474 |
|  | 530 | 1,200 | 170 | 21 | 26 | 348 |
|  | 1,490 | 883 | 159 | 26 | 37 | 1,047 |
|  | 187 | 862 | 165 | 24 | 28 | 232 |
|  | 2,260 | 941 | 154 | 22 | 39 | 1,235 |
|  | 1,708 | 805 | 155 | 25 | 31 | 910 |
|  | 1,847 | 896 | 137 | 24 | 33 | 1,050 |
|  | 131 | 563 | 109 | 15 | 13 | 263 |
|  | 137 | 579 | 109 | 16 | 15 | 294 |
|  | 141 | 611 | 101 | 15 | 14 | 271 |
|  | 156 | 742 | 71 | 4 | 6 | 48 |
|  | 147 | 769 | 104 | 4 | 8 | 54 |
|  | 146 | 463 | 74 | 4 | 4 | 35 |
|  | 150 | 591 | 76 | 3 | 3 | 34 |
|  | 134 | 714 | 91 | 4 | 6 | 53 |
|  | 796 | 580 | 85 | 5 | 10 | 494 |
|  | 1,244 | 621 | 119 | 6 | 22 | 501 |
|  | 827 | 519 | 130 | 6 | 20 | 452 |
|  | 980 | 463 | 160 | 10 | 25 | 653 |
|  | 225 | 981 | 131 | 23 | 21 | 344 |
|  | 174 | 874 | 120 | 25 | 13 | 313 |
|  | 245 | 805 | 124 | 19 | 13 | 256 |
|  | 55 | 626 | 85 | 11 | 6 | 64 |
|  | 86 | 664 | 89 | 14 | 18 | 106 |
|  | 906 | 670 | 91 | 18 | 31 | 786 |
|  | 344 | 855 | 104 | 13 | 13 | 204 |
|  | 637 | 1,456 | 197 | 30 | 36 | 442 |
|  | 239 | 940 | 152 | 21 | 37 | 274 |
|  | 387 | 1,153 | 106 | 13 | 8 | 119 |
|  | 109 | 342 | 54 | 8 | 25 | 156 |
|  | 422 | 345 | 67 | 16 | 67 | 303 |
|  | 524 | 416 | 110 | 22 | 107 | 321 |
|  | 1,181 | 606 | 172 | 36 | 197 | 616 |
|  | 1,083 | 593 | 92 | 34 | 166 | 410 |
|  | 528 | 729 | 131 | 13 | 19 | 432 |
|  | 315 | 695 | 124 | 12 | 18 | 372 |
|  | 3,154 | 664 | 95 | 19 | 22 | 1,678 |
|  | 198 | 682 | 68 | 7 | 11 | 97 |
|  | Pb | Mn | Ba | Cr | Cu | Zn |
|  | ppm | pm | ppm | ppm | ppm | ppm |
|  | 175 | 555 | 83 | 9 | 9 | 134 |
|  | 740 | 583 | 105 | 16 | 14 | 397 |
|  | 4,278 | 591 | 106 | 16 | 11 | 904 |
|  | 64 | 654 | 56 | 7 | 4 | 41 |
|  | 164 | 648 | 129 | 17 | 15 | 139 |
|  | 318 | 810 | 78 | 9 | 9 | 176 |
|  | 205 | 637 | 108 | 12 | 13 | 202 |
|  | 27 | 526 | 66 | 9 | 5 | 45 |
|  | 767 | 644 | 109 | 15 | 21 | 367 |
|  | 1,397 | 694 | 105 | 14 | 13 | 585 |
|  | 485 | 609 | 137 | 15 | 12 | 324 |
|  | 308 | 632 | 106 | 12 | 17 | 190 |
|  | 439 | 704 | 124 | 12 | 11 | 247 |
|  | 547 | 961 | 124 | 27 | 56 | 281 |
|  | 739 | 825 | 159 | 21 | 23 | 399 |
|  | 305 | 786 | 163 | 18 | 11 | 360 |
|  | 248 | 902 | 127 | 20 | 19 | 192 |
|  | 381 | 705 | 134 | 20 | 21 | 335 |
|  | 1,706 | 732 | 133 | 17 | 18 | 458 |
|  | 1,324 | 849 | 202 | 20 | 19 | 452 |
|  | 511 | 913 | 122 | 22 | 33 | 295 |
|  | 1,778 | 670 | 60 | 30 | 71 | 1,238 |
|  | 864 | 882 | 119 | 29 | 60 | 939 |
|  | 1,144 | 835 | 144 | 27 | 36 | 664 |
|  | 750 | 797 | 135 | 24 | 35 | 404 |
|  | 397 | 1,210 | 127 | 24 | 25 | 332 |
|  | 174 | 1,219 | 133 | 18 | 16 | 189 |
|  | 126 | 1,080 | 101 | 19 | 13 | 159 |
|  | 328 | 1,257 | 133 | 21 | 17 | 327 |
|  | 1,478 | 944 | 96 | 33 | 98 | 412 |
|  | 826 | 1,082 | 214 | 16 | 31 | 368 |
|  | 238 | 930 | 109 | 12 | 17 | 556 |
|  | 369 | 824 | 158 | 15 | 16 | 1,565 |
|  | 833 | 1,112 | 157 | 23 | 129 | 673 |
|  | 468 | 869 | 114 | 17 | 36 | 240 |
|  | 922 | 2,321 | 156 | 34 | 52 | 847 |
|  | 458 | 923 | 126 | 16 | 34 | 370 |
|  | 492 | 778 | 166 | 20 | 43 | 1,454 |
|  | 1,702 | 830 | 138 | 23 | 40 | 719 |
|  | 220 | 1,263 | 167 | 21 | 27 | 176 |
|  | Pb | Mn | Ba | Cr | Cu | Zn |
|  | ppm | pm | ppm | ppm | ppm | ppm |
|  | 1,166 | 766 | 190 | 16 | 19 | 407 |
|  | 698 | 917 | 138 | 14 | 20 | 228 |
|  | 885 | 737 | 130 | 15 | 13 | 300 |
|  | 570 | 538 | 81 | 18 | 52 | 281 |
|  | 174 | 715 | 125 | 14 | 12 | 175 |
|  | 628 | 763 | 150 | 15 | 20 | 270 |
|  | 256 | 764 | 180 | 17 | 24 | 273 |
|  | 373 | 575 | 129 | 15 | 30 | 340 |
|  | 701 | 764 | 173 | 20 | 36 | 651 |
|  | 1,616 | 945 | 159 | 28 | 40 | 775 |
|  | 155 | 567 | 73 | 12 | 14 | 196 |
|  | 263 | 621 | 96 | 16 | 21 | 213 |
|  | 45 | 384 | 70 | 12 | 8 | 70 |
|  | 2,150 | 738 | 81 | 56 | 32 | 1,478 |
|  | 131 | 637 | 60 | 15 | 15 | 97 |
|  | 76 | 865 | 93 | 17 | 12 | 473 |
|  | 60 | 605 | 73 | 19 | 11 | 113 |
|  | 234 | 973 | 151 | 18 | 18 | 240 |
|  | 678 | 876 | 181 | 28 | 46 | 512 |
|  | 417 | 838 | 139 | 20 | 26 | 374 |
|  | 489 | 816 | 155 | 17 | 20 | 382 |
|  | 203 | 748 | 113 | 12 | 16 | 183 |
|  | 571 | 879 | 121 | 18 | 34 | 469 |
|  | 2,602 | 881 | 125 | 25 | 72 | 1,453 |
|  | 806 | 848 | 125 | 22 | 72 | 702 |
|  | 799 | 1,074 | 117 | 27 | 120 | 1,144 |
|  | 1,647 | 1,147 | 184 | 37 | 166 | 809 |
|  | 204 | 898 | 140 | 24 | 27 | 948 |
|  | 499 | 973 | 117 | 26 | 29 | 918 |
|  | 574 | 1,126 | 91 | 28 | 46 | 761 |
|  | 477 | 1,025 | 114 | 21 | 30 | 377 |
|  | 148 | 876 | 112 | 19 | 18 | 215 |
|  | 411 | 740 | 112 | 18 | 25 | 190 |
|  | 218 | 869 | 116 | 18 | 15 | 207 |
|  | 86 | 888 | 107 | 13 | 9 | 115 |
|  | 194 | 914 | 102 | 16 | 11 | 191 |
|  | 141 | 1,020 | 95 | 13 | 9 | 110 |
|  | 213 | 628 | 85 | 11 | 13 | 153 |
|  | 1,008 | 748 | 125 | 18 | 18 | 581 |
|  | 872 | 1,139 | 119 | 14 | 18 | 303 |
|  | Pb | Mn | Ba | Cr | Cu | Zn |
|  | ppm | pm | ppm | ppm | ppm | ppm |
|  | 538 | 757 | 142 | 18 | 15 | 323 |
|  | 248 | 762 | 104 | 16 | 22 | 185 |
|  | 180 | 608 | 109 | 13 | 8 | 103 |
|  | 5 | 352 | 72 | 10 | 8 | 29 |
|  | 109 | 509 | 79 | 11 | 6 | 151 |
|  | 295 | 736 | 138 | 13 | 15 | 194 |
|  | 220 | 619 | 82 | 12 | 17 | 131 |
|  | 91 | 522 | 45 | 11 | 7 | 146 |
|  | 312 | 465 | 44 | 11 | 54 | 429 |
|  | 26 | 488 | 63 | 15 | 21 | 192 |
|  | 171 | 492 | 60 | 10 | 10 | 275 |
|  | 281 | 444 | 54 | 16 | 84 | 581 |
|  | 68 | 428 | 43 | 9 | 5 | 133 |
|  | 357 | 465 | 42 | 11 | 9 | 465 |
|  | 213 | 401 | 40 | 9 | 5 | 394 |
|  | 209 | 534 | 39 | 7 | 6 | 398 |
|  | 299 | 555 | 38 | 8 | 17 | 348 |
|  | 276 | 763 | 63 | 15 | 15 | 189 |
|  | 185 | 504 | 108 | 14 | 13 | 275 |
|  | 359 | 580 | 134 | 17 | 24 | 337 |
|  | 331 | 639 | 94 | 15 | 18 | 232 |
|  | 179 | 726 | 64 | 12 | 20 | 151 |
|  | 95 | 539 | 81 | 12 | 6 | 118 |
|  | 162 | 504 | 91 | 11 | 5 | 155 |
|  | 178 | 506 | 68 | 16 | 15 | 171 |
|  | 104 | 528 | 64 | 10 | 4 | 147 |
|  | 178 | 683 | 85 | 13 | 16 | 130 |
|  | 82 | 601 | 86 | 12 | 10 | 115 |
|  | 138 | 767 | 91 | 14 | 51 | 358 |
|  | 107 | 709 | 109 | 12 | 9 | 138 |
|  | 92 | 692 | 78 | 14 | 27 | 246 |
|  | 121 | 667 | 105 | 16 | 15 | 151 |
|  | 345 | 616 | 119 | 20 | 43 | 350 |
|  | 321 | 585 | 115 | 18 | 25 | 406 |
|  | 361 | 531 | 134 | 20 | 16 | 411 |
|  | 269 | 530 | 101 | 16 | 29 | 231 |
|  | 38 | 544 | 68 | 10 | 5 | 66 |
|  | 100 | 614 | 81 | 13 | 7 | 127 |
|  | 68 | 494 | 64 | 10 | 6 | 368 |
|  | 68 | 735 | 49 | 8 | 5 | 89 |
|  | Pb | Mn | Ba | Cr | Cu | Zn |
|  | ppm | pm | ppm | ppm | ppm | ppm |
|  | 81 | 628 | 80 | 12 | 7 | 132 |
|  | 74 | 487 | 58 | 11 | 8 | 127 |
|  | 115 | 546 | 88 | 16 | 9 | 323 |
|  | 97 | 426 | 64 | 14 | 16 | 356 |
|  | 224 | 426 | 93 | 14 | 31 | 383 |
|  | 104 | 300 | 34 | 8 | 11 | 181 |
|  | 601 | 791 | 321 | 33 | 97 | 796 |
|  | 175 | 895 | 194 | 24 | 44 | 209 |
|  | 366 | 1,130 | 199 | 33 | 44 | 305 |
|  | 35 | 662 | 71 | 15 | 14 | 112 |
|  | 50 | 530 | 66 | 12 | 8 | 161 |
|  | 25 | 437 | 63 | 14 | 14 | 100 |
|  | 26 | 440 | 62 | 15 | 16 | 77 |
|  | 22 | 551 | 87 | 18 | 11 | 83 |
|  | 31 | 625 | 97 | 17 | 11 | 99 |
|  | 16 | 506 | 81 | 16 | 9 | 72 |
|  | 215 | 426 | 127 | 16 | 25 | 270 |
|  | 187 | 488 | 94 | 16 | 16 | 206 |
|  | 151 | 446 | 92 | 13 | 18 | 183 |
|  | 33 | 269 | 41 | 9 | 3 | 44 |
|  | 66 | 307 | 49 | 12 | 4 | 57 |
|  | 37 | 422 | 52 | 11 | 6 | 80 |
|  | 38 | 518 | 72 | 16 | 16 | 778 |
|  | 31 | 690 | 53 | 10 | 6 | 41 |
|  | 34 | 704 | 64 | 12 | 6 | 44 |
|  | 24 | 330 | 60 | 14 | 16 | 53 |
|  | 17 | 371 | 86 | 13 | 26 | 86 |
|  | 32 | 395 | 117 | 28 | 22 | 106 |
|  | 15 | 190 | 20 | 6 | 7 | 34 |
|  | 14 | 284 | 40 | 10 | 11 | 32 |
|  | 6 | 469 | 59 | 13 | 11 | 53 |
|  | 7 | 480 | 59 | 14 | 12 | 57 |
|  | 14 | 587 | 87 | 18 | 21 | 76 |
|  | 17 | 573 | 92 | 26 | 26 | 111 |
|  | 15 | 539 | 81 | 21 | 24 | 82 |
|  | 19 | 613 | 80 | 20 | 24 | 78 |
|  | 12 | 530 | 83 | 21 | 20 | 75 |
|  | 26 | 804 | 80 | 20 | 9 | 42 |
|  | 15 | 602 | 60 | 15 | 6 | 36 |
|  | 17 | 708 | 72 | 17 | 6 | 33 |
|  | Pb | Mn | Ba | Cr | Cu | Zn |
|  | ppm | pm | ppm | ppm | ppm | ppm |
|  | 16 | 337 | 80 | 18 | 8 | 59 |
|  | 19 | 357 | 81 | 20 | 11 | 57 |
|  | 42 | 354 | 57 | 16 | 8 | 73 |
|  | 29 | 357 | 55 | 14 | 10 | 64 |
|  | 34 | 424 | 62 | 17 | 8 | 71 |
|  | 11 | 825 | 75 | 21 | 18 | 77 |
|  | 13 | 430 | 56 | 48 | 29 | 84 |
|  | 16 | 392 | 41 | 13 | 13 | 52 |
|  | 26 | 402 | 110 | 20 | 13 | 69 |
|  | 74 | 636 | 95 | 19 | 12 | 236 |
|  | 31 | 833 | 76 | 21 | 17 | 105 |
|  | 31 | 765 | 75 | 22 | 17 | 111 |
|  | 29 | 816 | 80 | 19 | 13 | 52 |
|  | 14 | 485 | 93 | 22 | 21 | 72 |
|  | 26 | 490 | 105 | 22 | 26 | 81 |
|  | 17 | 594 | 127 | 24 | 29 | 78 |
|  | 89 | 516 | 75 | 15 | 9 | 89 |
|  | 82 | 669 | 83 | 14 | 8 | 79 |
|  | 45 | 645 | 71 | 16 | 7 | 79 |
|  | 90 | 852 | 101 | 18 | 8 | 112 |
|  | 37 | 878 | 89 | 15 | 5 | 65 |
|  | 34 | 571 | 59 | 14 | 7 | 62 |
|  | 60 | 579 | 66 | 11 | 6 | 67 |
|  | 28 | 357 | 34 | 9 | 5 | 67 |
|  | 28 | 498 | 44 | 9 | 4 | 82 |
|  | 15 | 296 | 40 | 14 | 5 | 78 |
|  | 12 | 508 | 93 | 19 | 24 | 78 |
|  | 11 | 691 | 121 | 25 | 20 | 81 |
|  | 13 | 634 | 122 | 20 | 38 | 87 |
|  | 6 | 359 | 45 | 12 | 10 | 51 |
|  | 9 | 537 | 72 | 11 | 8 | 48 |
|  | 42 | 260 | 66 | 14 | 6 | 80 |
|  | 623 | 700 | 147 | 18 | 32 | 267 |
|  | 18 | 249 | 53 | 12 | 7 | 47 |
|  | 19 | 294 | 60 | 14 | 8 | 226 |
|  | 18 | 184 | 80 | 15 | 8 | 72 |
|  | 29 | 222 | 122 | 29 | 27 | 120 |
|  | 26 | 1,020 | 126 | 20 | 18 | 108 |
|  | 29 | 253 | 124 | 29 | 27 | 139 |
|  | 40 | 488 | 63 | 15 | 8 | 87 |
|  | Pb | Mn | Ba | Cr | Cu | Zn |
|  | ppm | pm | ppm | ppm | ppm | ppm |
|  | 40 | 444 | 67 | 17 | 8 | 82 |
|  | 35 | 359 | 60 | 15 | 8 | 72 |
|  | 180 | 763 | 131 | 22 | 17 | 184 |
|  | 134 | 509 | 107 | 20 | 12 | 155 |
|  | 127 | 548 | 84 | 16 | 11 | 140 |
|  | 123 | 541 | 93 | 16 | 13 | 156 |
|  | 107 | 703 | 96 | 15 | 10 | 181 |
|  | 38 | 855 | 122 | 16 | 11 | 70 |
|  | 92 | 915 | 127 | 27 | 21 | 255 |
|  | 61 | 752 | 96 | 17 | 21 | 116 |
|  | 18 | 755 | 103 | 16 | 6 | 33 |
|  | 15 | 723 | 99 | 15 | 5 | 35 |
|  | 37 | 1,174 | 140 | 24 | 11 | 27 |
|  | 1 | 341 | 80 | 17 | 9 | 43 |
|  | 3 | 588 | 94 | 13 | 10 | 77 |
|  | 4 | 533 | 91 | 12 | 9 | 86 |
|  | 4 | 431 | 68 | 10 | 4 | 34 |
|  | 4,717 | 620 | 293 | 75 | 59 | 2,596 |
|  | 248 | 609 | 128 | 34 | 23 | 298 |
|  | 840 | 653 | 216 | 51 | 37 | 761 |
|  | 49 | 1,024 | 103 | 11 | 8 | 68 |
|  | 24 | 975 | 107 | 12 | 7 | 75 |
|  | 35 | 878 | 112 | 15 | 9 | 100 |
|  | 71 | 366 | 88 | 19 | 9 | 99 |
|  | 96 | 491 | 100 | 23 | 10 | 128 |
|  | 44 | 380 | 59 | 13 | 6 | 67 |
|  | 38 | 219 | 59 | 13 | 6 | 62 |
|  | 44 | 279 | 59 | 13 | 5 | 67 |
|  | 44 | 376 | 51 | 13 | 5 | 64 |
|  | 41 | 289 | 52 | 11 | 4 | 58 |
|  | 45 | 381 | 57 | 14 | 6 | 78 |
|  | 39 | 229 | 50 | 12 | 5 | 66 |
|  | 34 | 419 | 59 | 14 | 5 | 71 |
|  | 45 | 317 | 72 | 19 | 7 | 91 |
|  | 58 | 304 | 73 | 17 | 7 | 98 |
|  | 63 | 315 | 77 | 17 | 7 | 92 |
|  | 159 | 576 | 162 | 16 | 12 | 216 |
|  | 2,785 | 235 | 147 | 12 | 8 | 632 |
|  | 467 | 233 | 111 | 16 | 9 | 748 |
|  | 540 | 174 | 108 | 9 | 5 | 1,342 |
|  | Pb | Mn | Ba | Cr | Cu | Zn |
|  | ppm | pm | ppm | ppm | ppm | ppm |
|  | 506 | 456 | 108 | 21 | 20 | 253 |
|  | 45 | 551 | 45 | 12 | 6 | 74 |
|  | 116 | 489 | 95 | 19 | 11 | 200 |
|  | 34 | 504 | 55 | 1,183 | 6 | 73 |
|  | 1,183 | 815 | 150 | 19 | 37 | 420 |
|  | 35 | 496 | 75 | 14 | 8 | 64 |
|  |  |  |  |  |  |  |
| Street |  |  |  |  |  |  |
|  | 7 | 456 | 67 | 14 | 12 | 54 |
|  | 15 | 380 | 62 | 11 | 10 | 111 |
|  | 259 | 378 | 78 | 29 | 23 | 256 |
|  | 358 | 549 | 114 | 19 | 35 | 234 |
|  | 18 | 649 | 53 | 11 | 8 | 47 |
|  | 19 | 438 | 63 | 13 | 8 | 76 |
|  | 69 | 491 | 69 | 14 | 17 | 121 |
|  | 67 | 450 | 74 | 12 | 12 | 116 |
|  | 43 | 622 | 64 | 12 | 10 | 72 |
|  | 50 | 696 | 68 | 14 | 13 | 82 |
|  | 24 | 388 | 54 | 16 | 13 | 86 |
|  | 24 | 401 | 59 | 16 | 15 | 100 |
|  | 13 | 236 | 62 | 12 | 6 | 54 |
|  | 41 | 432 | 87 | 19 | 10 | 89 |
|  | 68 | 882 | 106 | 21 | 11 | 124 |
|  | 47 | 352 | 70 | 16 | 12 | 72 |
|  | 660 | 756 | 264 | 24 | 29 | 384 |
|  | 13 | 419 | 81 | 15 | 13 | 61 |
|  | 292 | 1,090 | 158 | 23 | 33 | 313 |
|  | 73 | 301 | 107 | 27 | 10 | 131 |
|  | 18 | 624 | 94 | 18 | 11 | 81 |
|  | 48 | 821 | 127 | 25 | 9 | 101 |
|  | 33 | 607 | 129 | 24 | 20 | 112 |
|  | 96 | 475 | 58 | 16 | 11 | 107 |
|  | 201 | 868 | 94 | 20 | 14 | 135 |
|  | 115 | 650 | 94 | 19 | 13 | 166 |
|  | 192 | 521 | 77 | 19 | 20 | 157 |
|  | 145 | 568 | 116 | 27 | 20 | 185 |
|  | 32 | 685 | 54 | 15 | 9 | 61 |
|  | 449 | 719 | 125 | 34 | 35 | 282 |
|  | 518 | 936 | 168 | 24 | 24 | 360 |
|  | 86 | 527 | 83 | 23 | 17 | 142 |
|  | Pb | Mn | Ba | Cr | Cu | Zn |
|  | ppm | pm | ppm | ppm | ppm | ppm |
|  | 825 | 678 | 212 | 29 | 33 | 604 |
|  | 132 | 859 | 123 | 24 | 14 | 154 |
|  | 150 | 481 | 102 | 25 | 13 | 169 |
|  | 16 | 421 | 54 | 13 | 8 | 41 |
|  | 22 | 573 | 69 | 16 | 8 | 42 |
|  | 76 | 818 | 97 | 19 | 10 | 133 |
|  | 21 | 718 | 105 | 16 | 6 | 29 |
|  | 158 | 868 | 101 | 25 | 13 | 78 |
|  | 32 | 578 | 78 | 16 | 6 | 43 |
|  | 27 | 478 | 68 | 16 | 13 | 41 |
|  | 36 | 909 | 103 | 11 | 9 | 81 |
|  | 58 | 958 | 67 | 17 | 12 | 63 |
|  | 20 | 525 | 73 | 17 | 11 | 31 |
|  | 237 | 435 | 46 | 20 | 17 | 330 |
|  | 33 | 414 | 55 | 12 | 5 | 59 |
|  | 40 | 413 | 61 | 12 | 5 | 62 |
|  | 206 | 872 | 155 | 17 | 13 | 172 |
|  | 118 | 275 | 129 | 17 | 17 | 196 |
|  | 53 | 209 | 32 | 9 | 3 | 47 |
|  | 91 | 1,264 | 98 | 22 | 18 | 162 |
|  | 33 | 137 | 38 | 9 | 4 | 33 |
|  | 45 | 580 | 73 | 15 | 8 | 77 |
|  | 184 | 319 | 85 | 8 | 7 | 181 |
|  | 321 | 351 | 81 | 9 | 6 | 167 |
|  | 226 | 428 | 103 | 16 | 29 | 169 |
|  | 145 | 353 | 96 | 11 | 6 | 134 |
|  | 19 | 338 | 67 | 8 | 3 | 39 |
|  | 379 | 472 | 225 | 20 | 31 | 496 |
|  | 391 | 405 | 90 | 12 | 12 | 255 |
|  | 650 | 502 | 97 | 15 | 19 | 306 |
|  | 87 | 874 | 120 | 15 | 7 | 122 |
|  | 129 | 735 | 85 | 11 | 10 | 100 |
|  | 23 | 1,040 | 199 | 34 | 29 | 124 |
|  | 196 | 505 | 180 | 33 | 47 | 329 |
|  | 35 | 620 | 127 | 26 | 24 | 99 |
|  | 210 | 533 | 222 | 27 | 34 | 294 |
|  | 451 | 373 | 134 | 24 | 51 | 542 |
|  | 113 | 534 | 113 | 28 | 33 | 149 |
|  | 350 | 676 | 236 | 28 | 105 | 520 |
|  | 172 | 671 | 149 | 29 | 40 | 275 |
|  | Pb | Mn | Ba | Cr | Cu | Zn |
|  | ppm | pm | ppm | ppm | ppm | ppm |
|  | 126 | 686 | 122 | 21 | 25 | 174 |
|  | 680 | 751 | 483 | 54 | 178 | 1,190 |
|  | 37 | 879 | 140 | 28 | 23 | 102 |
|  | 986 | 453 | 356 | 41 | 888 | 1,330 |
|  | 284 | 609 | 201 | 29 | 50 | 381 |
|  | 161 | 682 | 132 | 28 | 40 | 207 |
|  | 62 | 510 | 114 | 23 | 29 | 118 |
|  | 201 | 672 | 137 | 25 | 35 | 222 |
|  | 76 | 484 | 105 | 24 | 27 | 120 |
|  | 92 | 765 | 126 | 30 | 26 | 530 |
|  | 96 | 817 | 138 | 28 | 21 | 114 |
|  | 68 | 638 | 110 | 21 | 16 | 96 |
|  | 86 | 515 | 107 | 22 | 26 | 147 |
|  | 397 | 548 | 165 | 33 | 61 | 344 |
|  | 226 | 579 | 126 | 27 | 38 | 242 |
|  | 183 | 505 | 150 | 23 | 37 | 245 |
|  | 363 | 580 | 99 | 30 | 46 | 219 |
|  | 73 | 718 | 115 | 24 | 28 | 143 |
|  | 80 | 488 | 85 | 20 | 29 | 104 |
|  | 294 | 1,020 | 257 | 29 | 54 | 340 |
|  | 419 | 1,080 | 234 | 30 | 55 | 906 |
|  | 50 | 1,030 | 160 | 29 | 31 | 196 |
|  | 218 | 263 | 126 | 24 | 29 | 314 |
|  | 1,720 | 834 | 969 | 30 | 68 | 2,930 |
|  | 240 | 346 | 197 | 28 | 62 | 423 |
|  | 171 | 864 | 163 | 30 | 195 | 355 |
|  | 967 | 1,070 | 222 | 32 | 53 | 691 |
|  | 211 | 907 | 156 | 22 | 39 | 393 |
|  | 259 | 1,070 | 245 | 33 | 58 | 411 |
|  | 614 | 554 | 252 | 30 | 369 | 1,120 |
|  | 182 | 1,130 | 159 | 29 | 34 | 261 |
|  | 440 | 714 | 142 | 35 | 50 | 713 |
|  | 136 | 785 | 128 | 22 | 25 | 179 |
|  | 47 | 741 | 132 | 29 | 24 | 114 |
|  | 35 | 986 | 111 | 20 | 15 | 88 |
|  | 14 | 517 | 103 | 22 | 22 | 81 |
|  | 61 | 1,010 | 139 | 39 | 50 | 176 |
|  | 380 | 504 | 142 | 19 | 40 | 357 |
|  | 223 | 745 | 145 | 28 | 35 | 204 |
|  | 79 | 752 | 129 | 37 | 30 | 170 |
|  | Pb | Mn | Ba | Cr | Cu | Zn |
|  | ppm | pm | ppm | ppm | ppm | ppm |
|  | 22 | 445 | 125 | 30 | 19 | 84 |
|  | 60 | 723 | 131 | 19 | 18 | 118 |
|  | 220 | 1,070 | 158 | 26 | 38 | 303 |
|  | 127 | 827 | 130 | 24 | 23 | 152 |
|  | 15 | 590 | 104 | 24 | 24 | 88 |
|  | 33 | 493 | 119 | 12 | 9 | 79 |
|  | 165 | 547 | 80 | 15 | 7 | 118 |
|  | 90 | 428 | 71 | 13 | 8 | 94 |
|  | 49 | 392 | 65 | 13 | 6 | 67 |
|  | 713 | 596 | 201 | 12 | 9 | 205 |
|  | 162 | 375 | 57 | 12 | 8 | 95 |
|  | 470 | 633 | 109 | 14 | 16 | 289 |
|  | 176 | 528 | 76 | 8 | 6 | 85 |
|  | 198 | 383 | 70 | 7 | 20 | 104 |
|  | 542 | 964 | 118 | 17 | 24 | 235 |
|  | 233 | 419 | 109 | 16 | 19 | 312 |
|  | 2,227 | 643 | 206 | 21 | 69 | 3,692 |
|  | 208 | 883 | 91 | 12 | 12 | 115 |
|  | 393 | 554 | 104 | 18 | 17 | 190 |
|  | 129 | 601 | 75 | 17 | 11 | 120 |
|  | 82 | 913 | 98 | 79 | 13 | 126 |
|  | 123 | 569 | 93 | 16 | 13 | 147 |
|  | 393 | 854 | 151 | 16 | 12 | 215 |
|  | 70 | 620 | 80 | 46 | 9 | 106 |
|  | 120 | 647 | 118 | 22 | 27 | 119 |
|  | 30 | 738 | 93 | 22 | 15 | 77 |
|  | 428 | 711 | 150 | 43 | 38 | 287 |
|  | 21 | 508 | 59 | 15 | 9 | 93 |
|  | 333 | 753 | 182 | 29 | 51 | 239 |
|  | 211 | 603 | 72 | 24 | 18 | 128 |
|  | 343 | 1,183 | 168 | 34 | 36 | 392 |
|  | 352 | 426 | 93 | 25 | 17 | 237 |
|  | 835 | 622 | 112 | 24 | 38 | 536 |
|  | 268 | 488 | 100 | 16 | 18 | 188 |
|  | 67 | 937 | 96 | 11 | 10 | 105 |
|  | 245 | 828 | 102 | 15 | 15 | 162 |
|  | 352 | 527 | 93 | 12 | 7 | 257 |
|  | 227 | 802 | 123 | 17 | 15 | 271 |
|  | 117 | 669 | 100 | 14 | 8 | 415 |
|  | 255 | 578 | 136 | 15 | 11 | 396 |
|  | Pb | Mn | Ba | Cr | Cu | Zn |
|  | ppm | pm | ppm | ppm | ppm | ppm |
|  | 152 | 1,040 | 102 | 12 | 15 | 122 |
|  | 2,654 | 978 | 186 | 28 | 42 | 1,423 |
|  | 238 | 1,001 | 110 | 12 | 13 | 138 |
|  | 172 | 922 | 101 | 14 | 14 | 405 |
|  | 89 | 573 | 65 | 3 | 3 | 31 |
|  | 156 | 720 | 94 | 4 | 5 | 42 |
|  | 158 | 569 | 69 | 4 | 5 | 55 |
|  | 911 | 619 | 151 | 5 | 22 | 509 |
|  | 159 | 987 | 102 | 15 | 12 | 189 |
|  | 95 | 826 | 105 | 13 | 9 | 96 |
|  | 635 | 908 | 116 | 13 | 24 | 875 |
|  | 511 | 743 | 106 | 16 | 19 | 308 |
|  | 258 | 614 | 94 | 11 | 14 | 149 |
|  | 1,133 | 892 | 91 | 19 | 65 | 1,165 |
|  | 266 | 899 | 126 | 15 | 16 | 240 |
|  | 159 | 528 | 85 | 11 | 19 | 150 |
|  | 57 | 877 | 79 | 9 | 14 | 115 |
|  | 1,433 | 975 | 145 | 21 | 53 | 902 |
|  | 110 | 617 | 107 | 13 | 6 | 103 |
|  | 36 | 1,118 | 109 | 17 | 7 | 87 |
|  | 211 | 550 | 84 | 11 | 18 | 172 |
|  | 944 | 767 | 115 | 20 | 37 | 1,159 |
|  | 96 | 814 | 94 | 15 | 13 | 186 |
|  | 45 | 606 | 118 | 16 | 11 | 94 |
|  | 640 | 924 | 137 | 20 | 42 | 289 |
|  | 230 | 995 | 106 | 34 | 25 | 417 |
|  | 36 | 608 | 72 | 14 | 19 | 135 |
|  | 65 | 183 | 43 | 9 | 5 | 155 |
|  | 102 | 102 | 36 | 11 | 16 | 295 |
|  | 25 | 439 | 39 | 7 | 4 | 101 |
|  | 16 | 123 | 33 | 10 | 3 | 70 |
|  | 43 | 493 | 57 | 14 | 9 | 63 |
|  | 142 | 991 | 75 | 18 | 7 | 106 |
|  | 166 | 500 | 63 | 19 | 13 | 219 |
|  | 31 | 488 | 40 | 13 | 7 | 65 |
|  | 303 | 387 | 72 | 14 | 9 | 173 |
|  | 135 | 702 | 76 | 14 | 13 | 121 |
|  | 158 | 1,358 | 137 | 30 | 23 | 134 |
